# Supplementary material
Source: publisher site journal article supplement (https://www.dovepress.com/article/539091)
Supplement: Supplementary file 1 [file 539091%20Appendix%20A.docx]

**Appendix A – Interview Guide for Primary Care Providers**

**Introduction**

The purpose of this study is to enhance access to lung cancer screening for priority populations by partnering with patients and stakeholders, such as yourself in the development of a learning module that will foster equity-informed approaches to care.

The information which you share with us in the interview will help us develop the content for this learning module.

In the interview, we will discuss the use of low-dose CT (LDCT) for lung cancer screening. We want to understand your perspectives on Lung Cancer Screening (LCS), specifically how we can increase access to LCS for everyone at risk. We also want to get your feedback on training which you have received on equity-oriented care and/or EQUIP (Equipping Health and Social Services for Equity) and any recommendations which you may have to promote the uptake of LCS through these modules.

**INTERVIEW QUESTIONS:**

1. Can you please tell us more about your role in primary care? Probe: share with me your day to day work experience? Can you describe your patient population (age, income, chronic health conditions-COPD, Asthma, diabetes, Hypertension, geography etc)?

2. Why do you consider the population which you provide care for, as structurally underserved?

3. What has been your experience with LCS?

4. From your experience which populations will benefit the most from LCS?

5. What are the issues in terms of access to LCS for these populations? Probe: priority populations

6. What do you think influences a person’s choice to access LCS?

7. Patient’s are sometimes not comfortable talking about smoking, how do you start such conversations? Probe: emotional and physical safety – timing of such conversations

8. When do you approach your patient to discuss prevention measures like LCS/ smoking cessation/other options like nicotine patch? Probe: time, priority of patient (housing, mental health issues, co-morbid health conditions, stress etc).

8. How do you determine and help patients find resources like employment, income, family support, food, housing?

9. In your experience how do you get a sense of when patients are ready to improve their health? What types of prompts/ signals are your looking for?

10. How can access to LCS be improved for all segments of society (probe limited income and family supports and no access to medications ? What is needed at the individual, provider and systems level to increase assessment of smoking and recommend LCS?

11 .What do you see your role in improving access to LCS? Probe: what would you be required to do? What support would you need?

12. One of the reasons why we wanted to talk to you was because you had received training in equity-oriented care and/or the EQUIP training modules. How did taking this training help you serve priority populations? We are developing an add-on module specific to LCS - Do you have any recommendations on the content of the proposed module? From your experience, what specific recommendations would you make for lung cancer screening?
